# Supplementary material for: Polyurea networks via organic sol–gel crosslinking polymerization of tetrafunctional amines and diisocyanates and their selective adsorption and filtration of carbon dioxide
Source: Royal Society of Chemistry journal article supplement (doi:10.1039/c3py01593a), 2013-11-28
Supplement: c3py01593a.pdf [file c3py01593a.pdf]

Supplementary Information for

Polyurea networks via organic sol-gel crosslinking  
polymerization of tetrafunctional amines and  
diisocyanates and their selective adsorption and  
filtration of carbon dioxide

*Su-Young Moon, Eunkyung Jeon, Jae-Sung Bae, Minseon Byeon and Ji-Woong Park\**

\* E-mail: [jiwoong@gist.ac.kr](mailto:jiwoong@gist.ac.kr), Tel: +82-62-715-2315, Fax: +82-62-715-2314

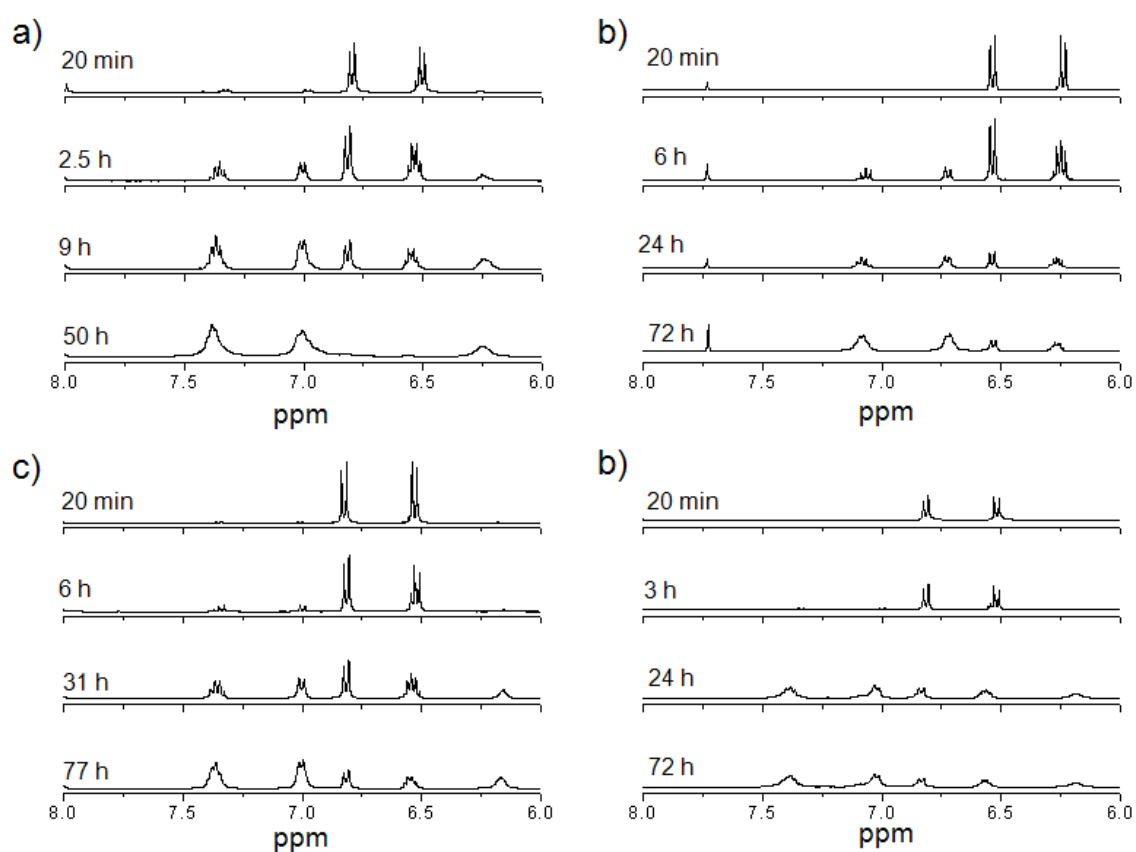

**Fig. S1**  $^1\text{H}$  NMR spectroscopy on the polymerization solution of 0.04 g/mL in  $\text{DMF-d}_7$  recorded at different reaction times; a) TAPM/BDI, b) TAPM/HDI, c) TAPM/ODI, d) TAPM/DDI.

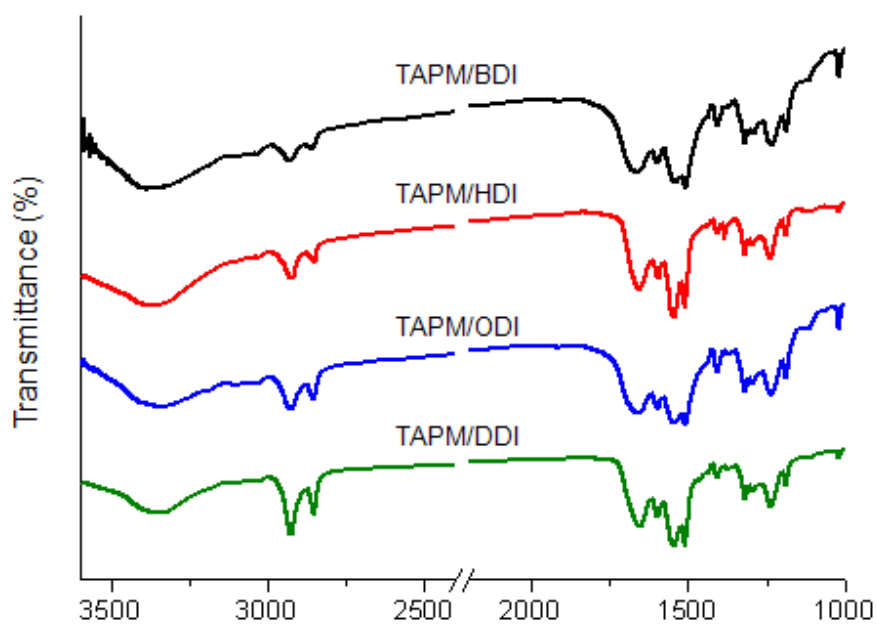

**Fig. S2** FT-IR spectra of TAPM/BDI, TAPM/HDI, TAPM/ODI and TAPM/DDI

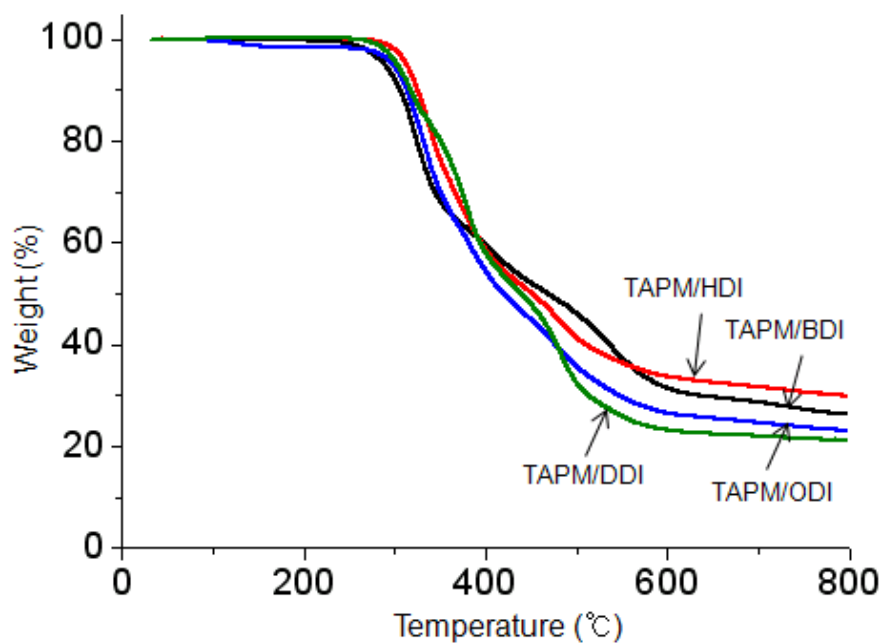

**Fig. S3** TGA thermogram of TAPM/BDI, TAPM/HDI, TAPM/ODI and TAPM/DDI

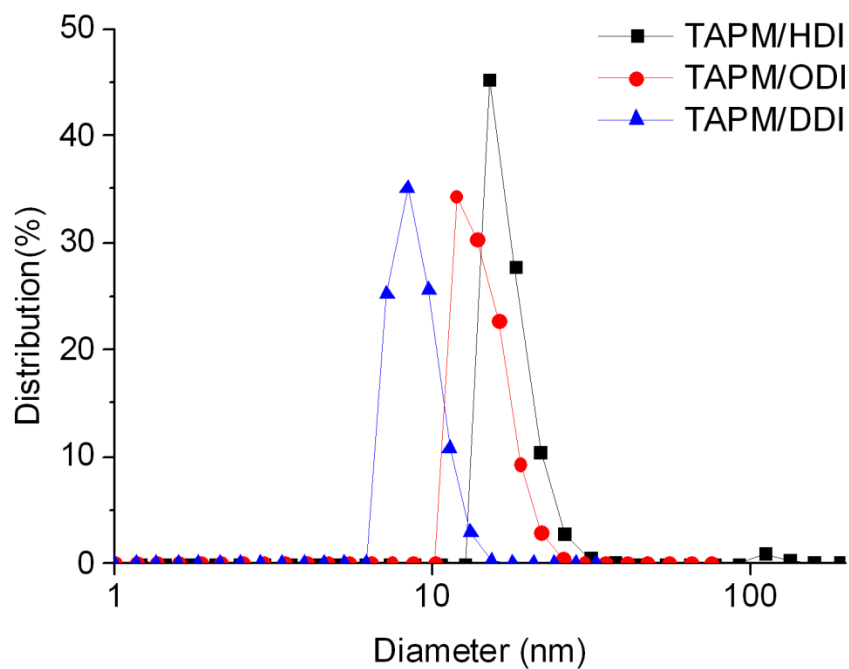

**Fig. S4** Number distribution of particle diameter of 0.04 g/mL solution obtained from DLS measurements at the same reaction conversion (70 %).

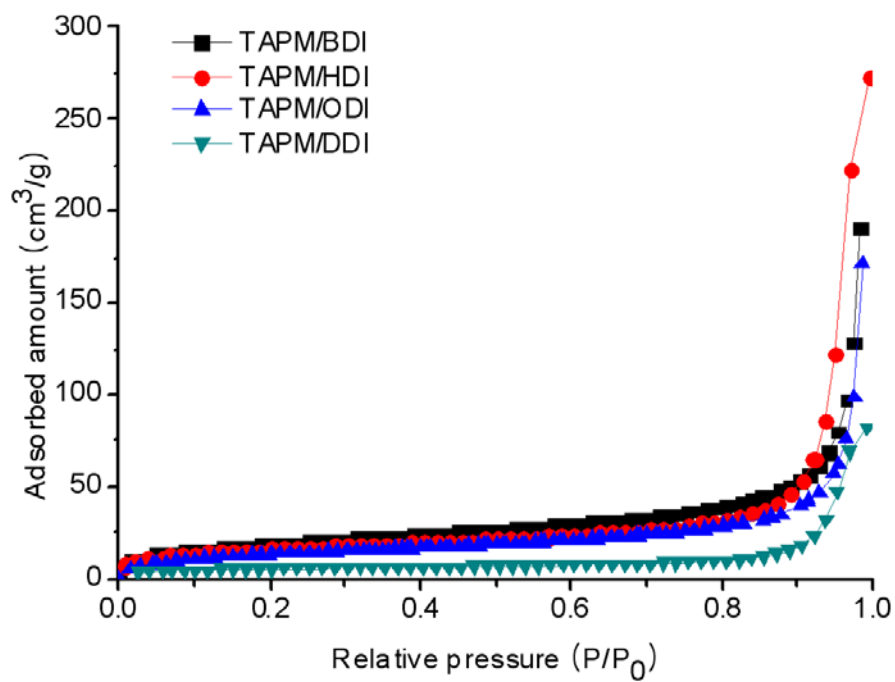

**Fig. S5** Nitrogen adsorption for OMNs at 77K

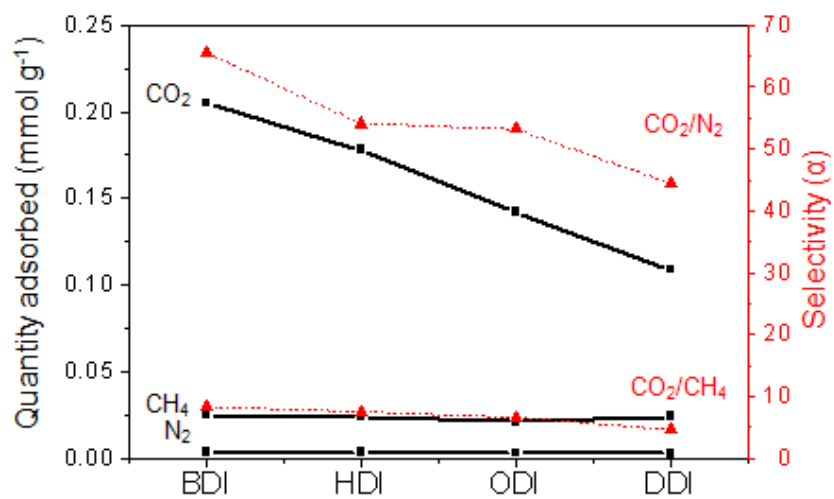

**Fig. S6** Amount of adsorbed gas at 0.1 bar and gas adsorption selectivity for OMNs.

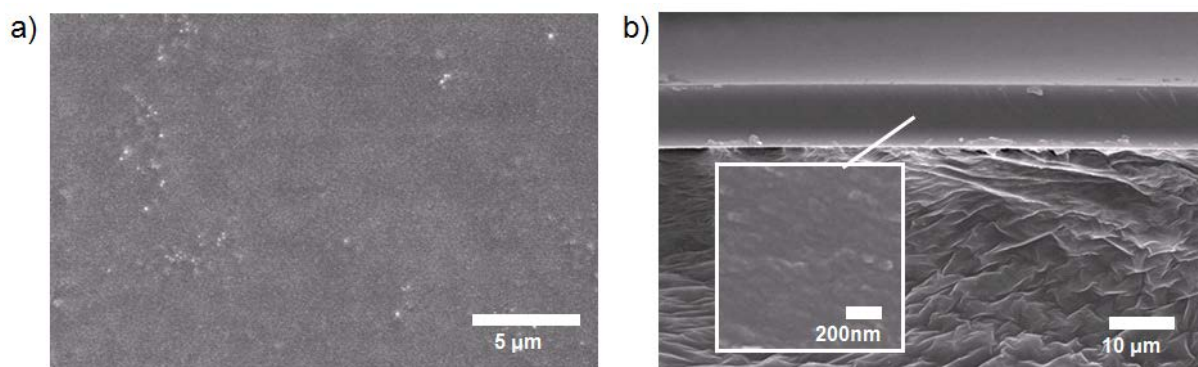

**Fig. S7** SEM images of a) surface and cross section of TAPM/HDI free-standing film.
